# Supplementary material for: Betacyanins enhance vitexin-2-O-xyloside mediated inhibition of proliferation of T24 bladder cancer cells
Source: Royal Society of Chemistry journal article supplement (doi:10.1039/c6fo01130f), 2016-01-01
Supplement: c6fo01130f1.pdf [file c6fo01130f1.pdf]

**Fig. 1 Supplementary.** Agarose gels for PCR experiments for BCL2 and  $\beta$ -ACTIN gene expression. Cells were untreated (CTRL), treated with 2.5  $\mu\text{g}/\text{ml}$  Vitexin-2-O-xyloside (XVX), 50  $\mu\text{g}/\text{ml}$  Betacyanins (BC), or 2.5  $\mu\text{g}/\text{ml}$  Vitexin-2-O-xyloside+50  $\mu\text{g}/\text{ml}$  Betacyanins (XVX+BC) for 24h, before RNA extraction and cDNA production. The values of the quantification of the intensity of the bands corresponding to BCL2 gene expression, after normalization with  $\beta$ -ACTIN levels in each sample, are shown. Three replicate experiments were performed. n.s.: not statistically significant.

---
