# Supplementary material for: Betacyanins enhance vitexin-2-O-xyloside mediated inhibition of proliferation of T24 bladder cancer cells
Source: Royal Society of Chemistry journal article supplement (doi:10.1039/c6fo01130f), 2016-01-01
Supplement: c6fo01130f3.pdf [file c6fo01130f3.pdf]

Table 1, Supplementary. T24 cell mortality induced by individual and combined BX and BC treatments, and synergy evaluation at 24, 48 and 72h.

| Treatments | Compounds | Measured mortality (%) | Expected mortality (%) | Measured/Expected ratio |
|------------|-----------|------------------------|------------------------|-------------------------|
| 24h        | BX        | 2.9±0.4                |                        |                         |
|            | BC        | 15.1±1.4               |                        |                         |
|            | BX+BC     | 19.2±1.9               | 18.0±1.9               | 1.07±0.12 n.s. (p=0.48) |
| 48h        | BX        | 1.8±0.3                |                        |                         |
|            | BC        | 40.3±3.1               |                        |                         |
|            | BX+BC     | 34.9±3.2               | 42.1±3.4               | 0.83±0.09 n.s. (p=0.09) |
| 72h        | BX        | 3.5±0.5                |                        |                         |
|            | BC        | 42.5±4.8               |                        |                         |
|            | BX+BC     | 34.5±2.6               | 46.0±5.2               | 0.75±0.15 n.s. (p=0.07) |

BX: 100 µg/ml; BC: 100 µg/ml; n.s.: not statistically significant, when compared with the additive effect (1.0±0.1).
