# Supplementary figures and images for: Betacyanins enhance vitexin-2-O-xyloside mediated inhibition of proliferation of T24 bladder cancer cells
Source: Royal Society of Chemistry journal article supplement (doi:10.1039/c6fo01130f), 2016-01-01

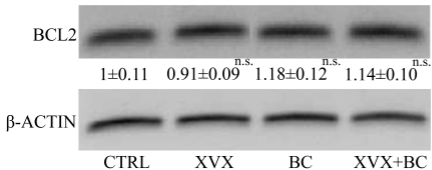

Supplement: c6fo01130f2.pdf [file c6fo01130f2.pdf]
